# Supplementary material for: The influence of DC voltage on the conductivity of chloroprene rubber-carbon black composites for flexible resistive heating elements
Source: Royal Society of Chemistry journal article supplement (doi:10.1039/d3ra01558k), 2023-01-01
Supplement: d3ra01558k1.pdf [file d3ra01558k1.pdf]

Supplementary information

### S1 Arrhenius equation

Describes the conductivity for a thermally activated process<sup>1</sup>:

$$\sigma = \sigma_0 \exp\left(\frac{-\Delta E_a}{k_B T}\right) \quad (\text{S1})$$

$\sigma$  – conductivity,  $\sigma_0$  – constant, equal to conductivity at zero Kelvin,  $\Delta E_a$  – activation energy for conduction,  $T$  – absolute temperature,  $k_B$  – Boltzmann's constant.

### S2 A brief conductivity model description

As NTC effect is explainable by a hopping or tunnelling mechanism of charge carriers, Mott's VRH model was considered. VHR model considers the temperature dependence on DC conductivity in amorphous and disordered materials (applicable to polymer composites). The charge carrier moves (hops) between two localized states that have similar energies, but are spatially separated. The main formula is <sup>2</sup>:

$$\sigma(T) = \sigma_0 \exp\left[-\left(\frac{T_0}{T}\right)^\gamma\right]$$

where  $\sigma_0$  – considered as the limiting value of conductivity at infinite temperature,  $T_0$  – the characteristic temperature that determines the thermally activated hopping among localized states at different energies and considered as a measure of disorder, and the exponent  $\gamma$  is related to the dimensionality. For 2D systems  $\gamma = 1/3$ , but for 3D systems  $\gamma = 1/4$ .

FNT - Fowler-Nordheim tunnelling

This model considers that electrons are able to cross a barrier of a height due to its bending because of intense electric field. The simplified formula for the model is<sup>3</sup>:

$$I = CF^2 e^{-\alpha/F}$$

where  $I$  – tunnelling current strength,  $F$  – electric field, and  $C$  and  $\alpha$  – constants.

For tunnelling in composites, the simplified formula expands <sup>4</sup>:

$$I \propto \sum_1^{n_1} v^2 \exp\left(-\frac{8\pi s \sqrt{2m\phi^3}}{2.96ehv}\right)$$

where  $I$  – tunnelling current strength,  $v$  – voltage,  $s$  – thickness of insulating layer of the potential barrier,  $\phi$  – potential barrier height,  $m$  – electron mass,  $h$  - Planck's constant.

### References

- 1 R. Zhang, Y. Bin, R. Chen and M. Matsuo, *Polym. J.* 2013 4511, 2013, **45**, 1120–1134.
- 2 G. C. Psarras, *Compos. Part A Appl. Sci. Manuf.*, 2006, **37**, 1545–1553.
- 3 R. H. Fowler and L. Nordheim, *Proc. R. Soc. London. Ser. A, Contain. Pap. a Math. Phys. Character*, 1928, **119**, 173–181.
- 4 S. Pandey, C. Biswas, T. Ghosh, J. J. Bae, P. Rai, G. H. Kim, K. J. Thomas, Y. H. Lee, P. Nikolaev and S. Arepalli, *Nanoscale*, 2014, **6**, 3410–3417.
